# Supplementary material for: Iron accumulation induces oxidative stress, while depressing inflammatory polarization in human iPSC-derived microglia
Source: PubMed Central journal article supplement (PMC9213827; doi:10.1016/j.stemcr.2022.04.006), 2022-05-05
Supplement: mmc1.pdf [file mmc1.pdf]

**Stem Cell Reports, Volume 17**

**Supplemental Information**

**Iron accumulation induces oxidative stress,  
while depressing inflammatory polarization  
in human iPSC-derived microglia**

**Boyd Kenkhuis, Michelle van Eekeren, David A. Parfitt, Yavuz Ariyurek, Poulomi Banerjee, Josef Priller, Louise van der Weerd, and Willeke M.C. van Roon-Mom**

## Supplementary Information

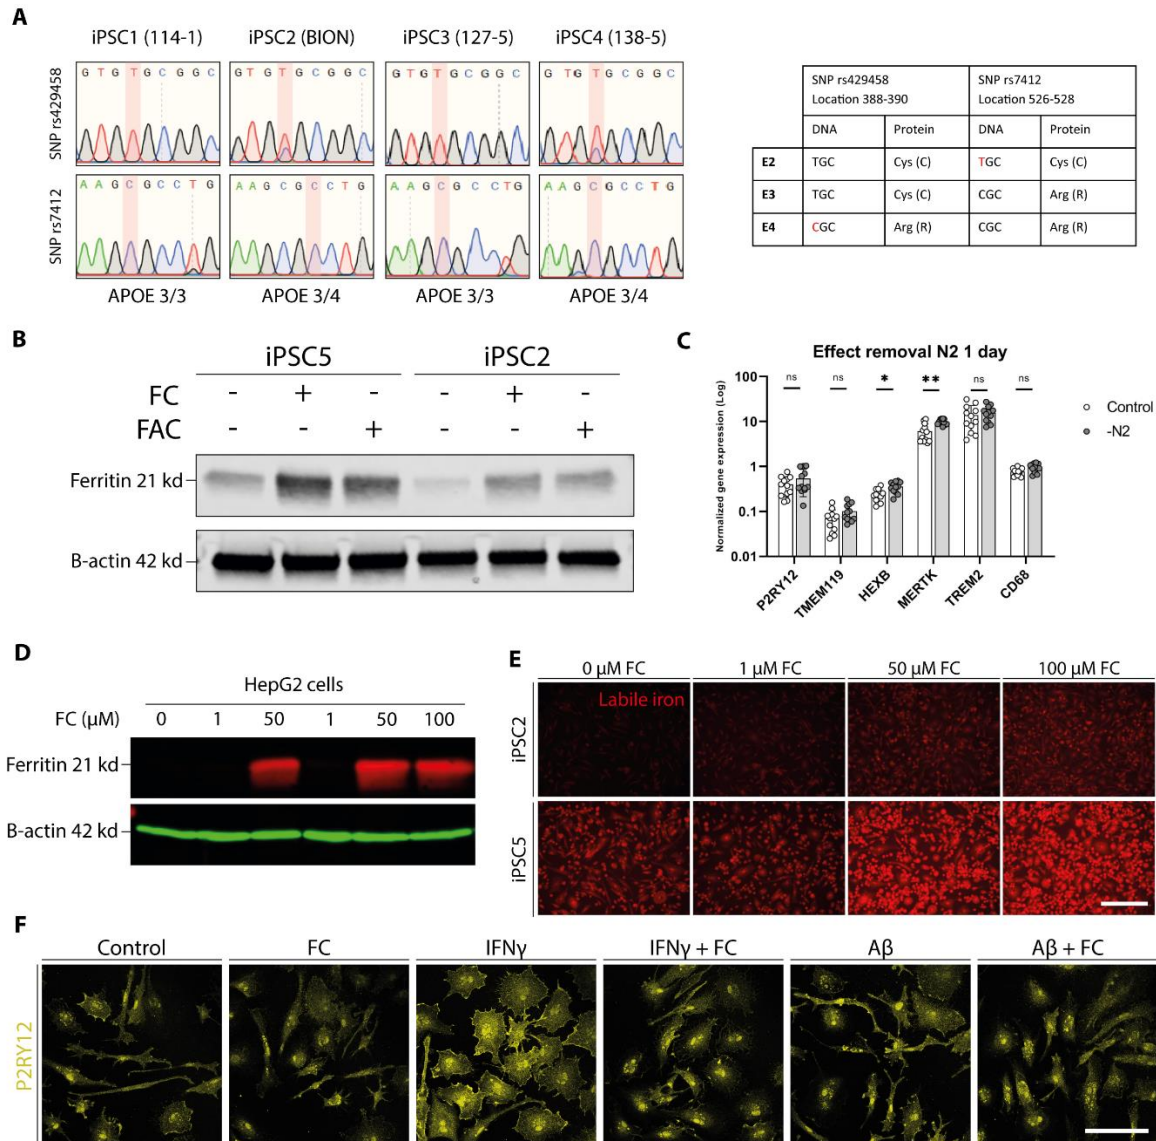

**Fig. S1 iPSC and iron loading validation, related to Figure 1 and 2. A** APOE genotyping of iPSC-lines **B** Western blot for ferritin following ferric citrate (FC) and ferric ammonium citrate (FAC) treatment **C** qPCR analysis of expression of core microglia genes prior to and after 24h N2 removal **D** Western blot for ferritin following FC treatment at different doses with HepG2 cells **E** Representative images of live cell imaging of labile iron showing increased cytosolic iron after 50 and 100  $\mu$ M, but not after 0 or 1  $\mu$ M. Scale bar 200  $\mu$ m **F** P2RY12 expression is increased following IFN $\gamma$  treatment on immunofluorescence. Scale bar 100  $\mu$ m

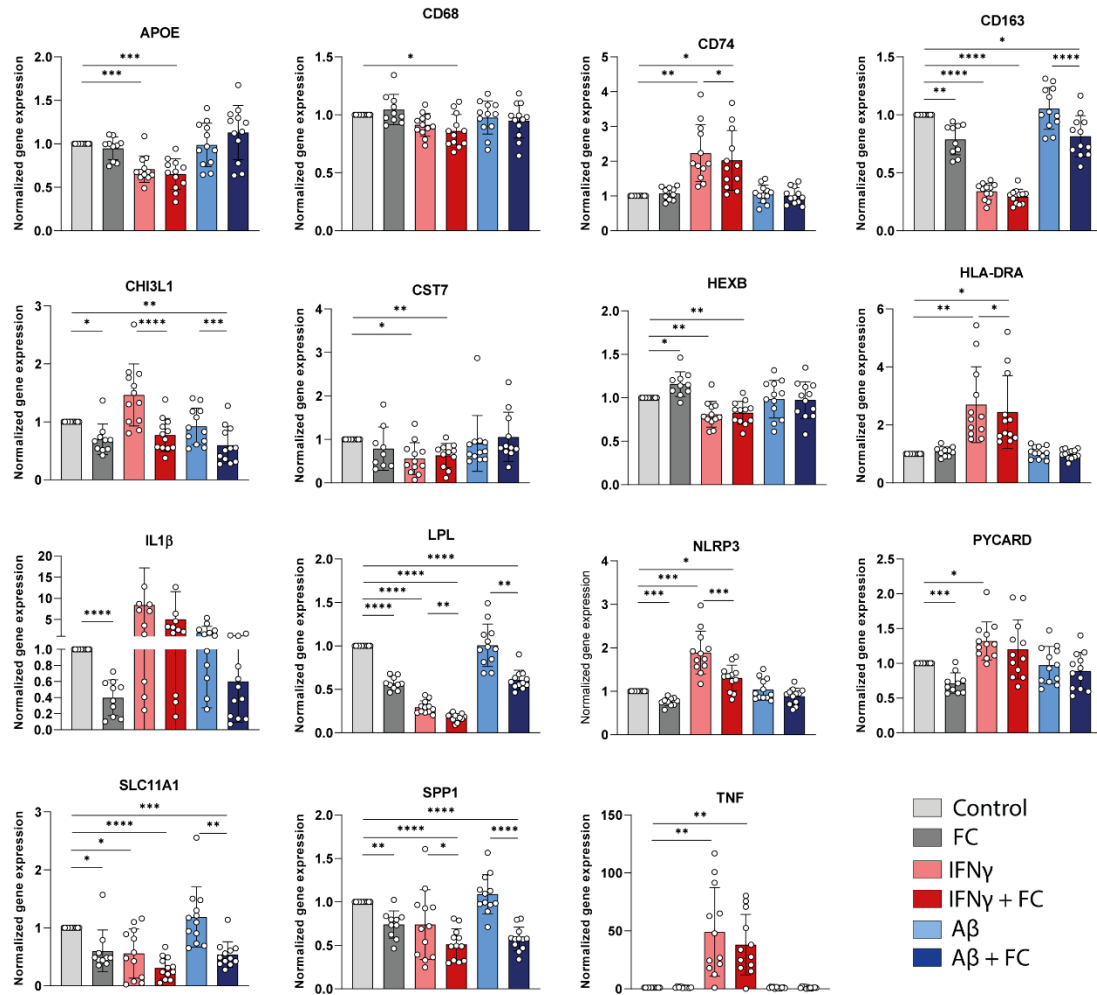

**Fig. S2** Bargraphs of targeted gene-expression analysis using the Dynamic Array (Fluidigm), related to Figure 4.

### Control vs FC

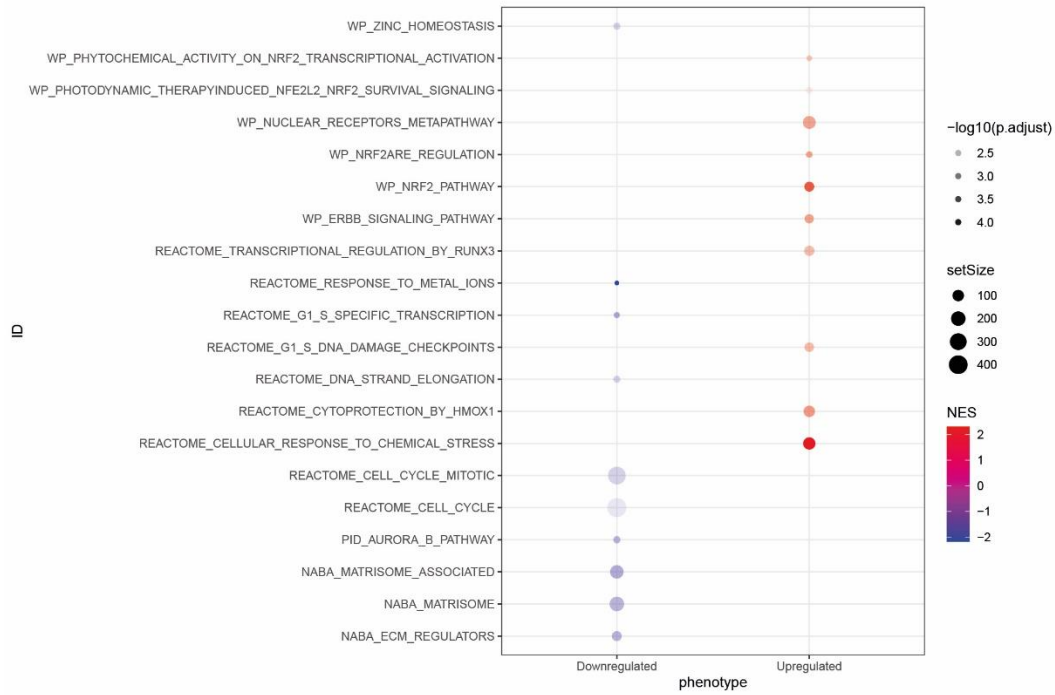

### Control vs IFN $\gamma$

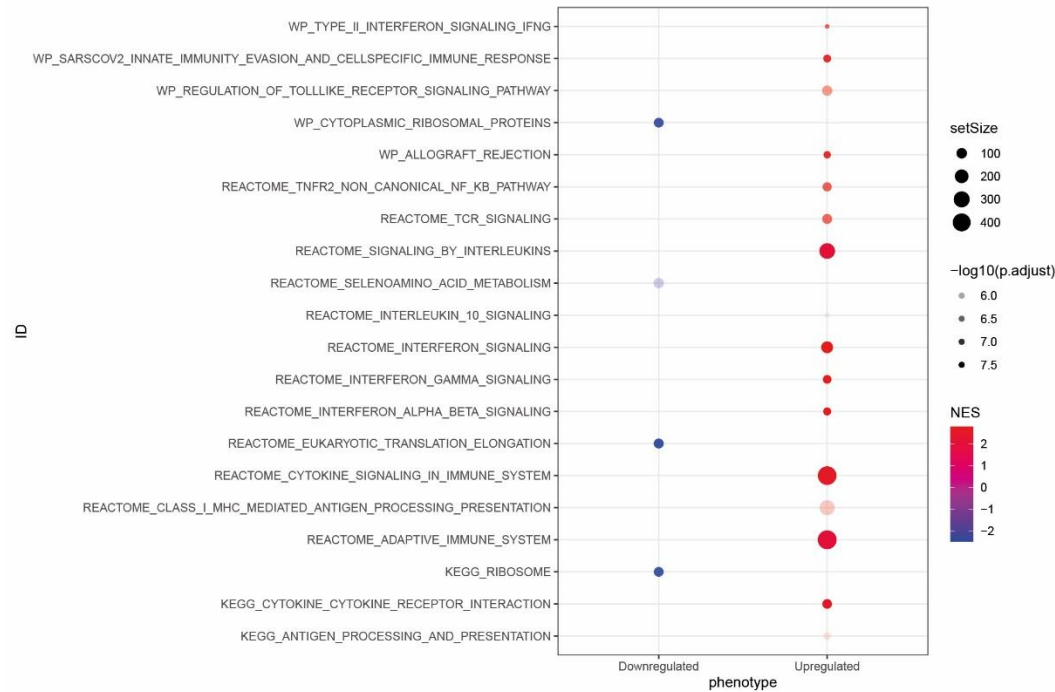

**Fig. S3 GSEA analysis results.** Legend on next page.

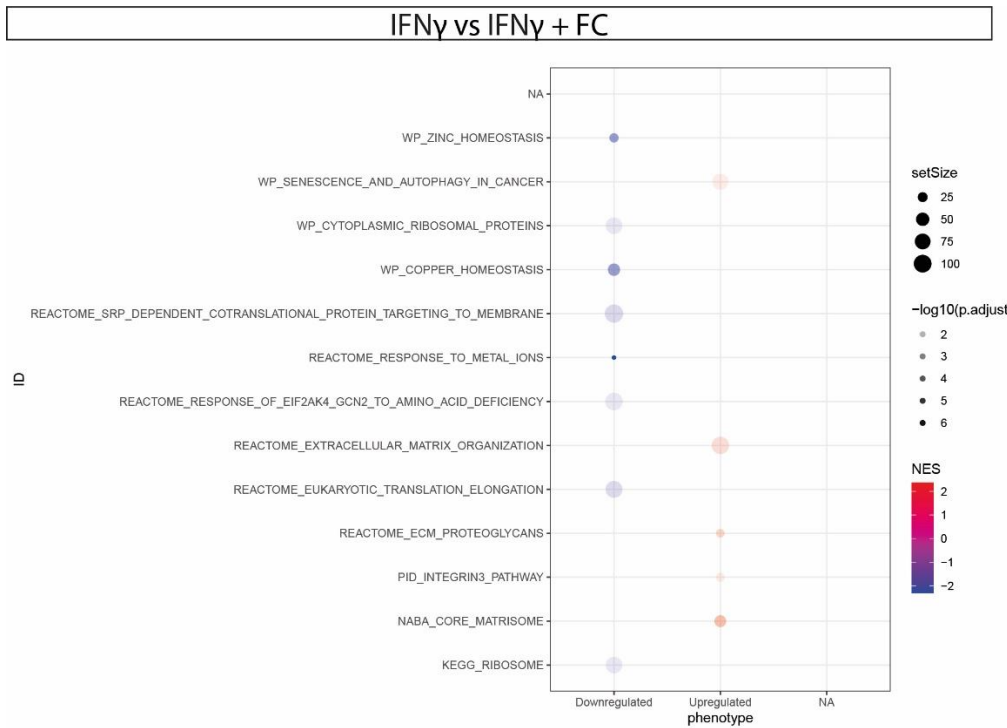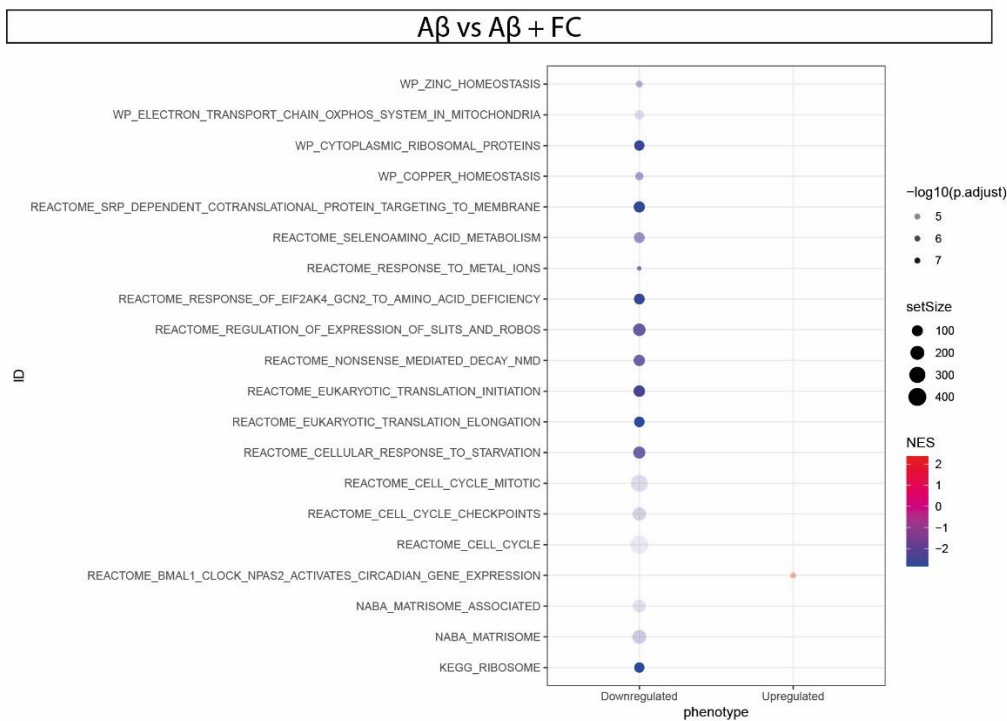

**Fig. S3 GSEA analysis results, related to Figure 5.** GSEA results from control vs FC and control vs IFN $\gamma$  show excellent overlap with identified GO terms as was highlighted in the paper. However, although the differentially expressed genes showed considerable overlap between control vs FC and A $\beta$  vs A $\beta$  + FC, considering A $\beta$  had little effect, we do see differences in identified GSEA pathways. These differences are primarily in the omission of the upregulated pathways concerning oxidative stress. The identified downregulated pathways in metal ion metabolism do overlap and appear to be more robust.

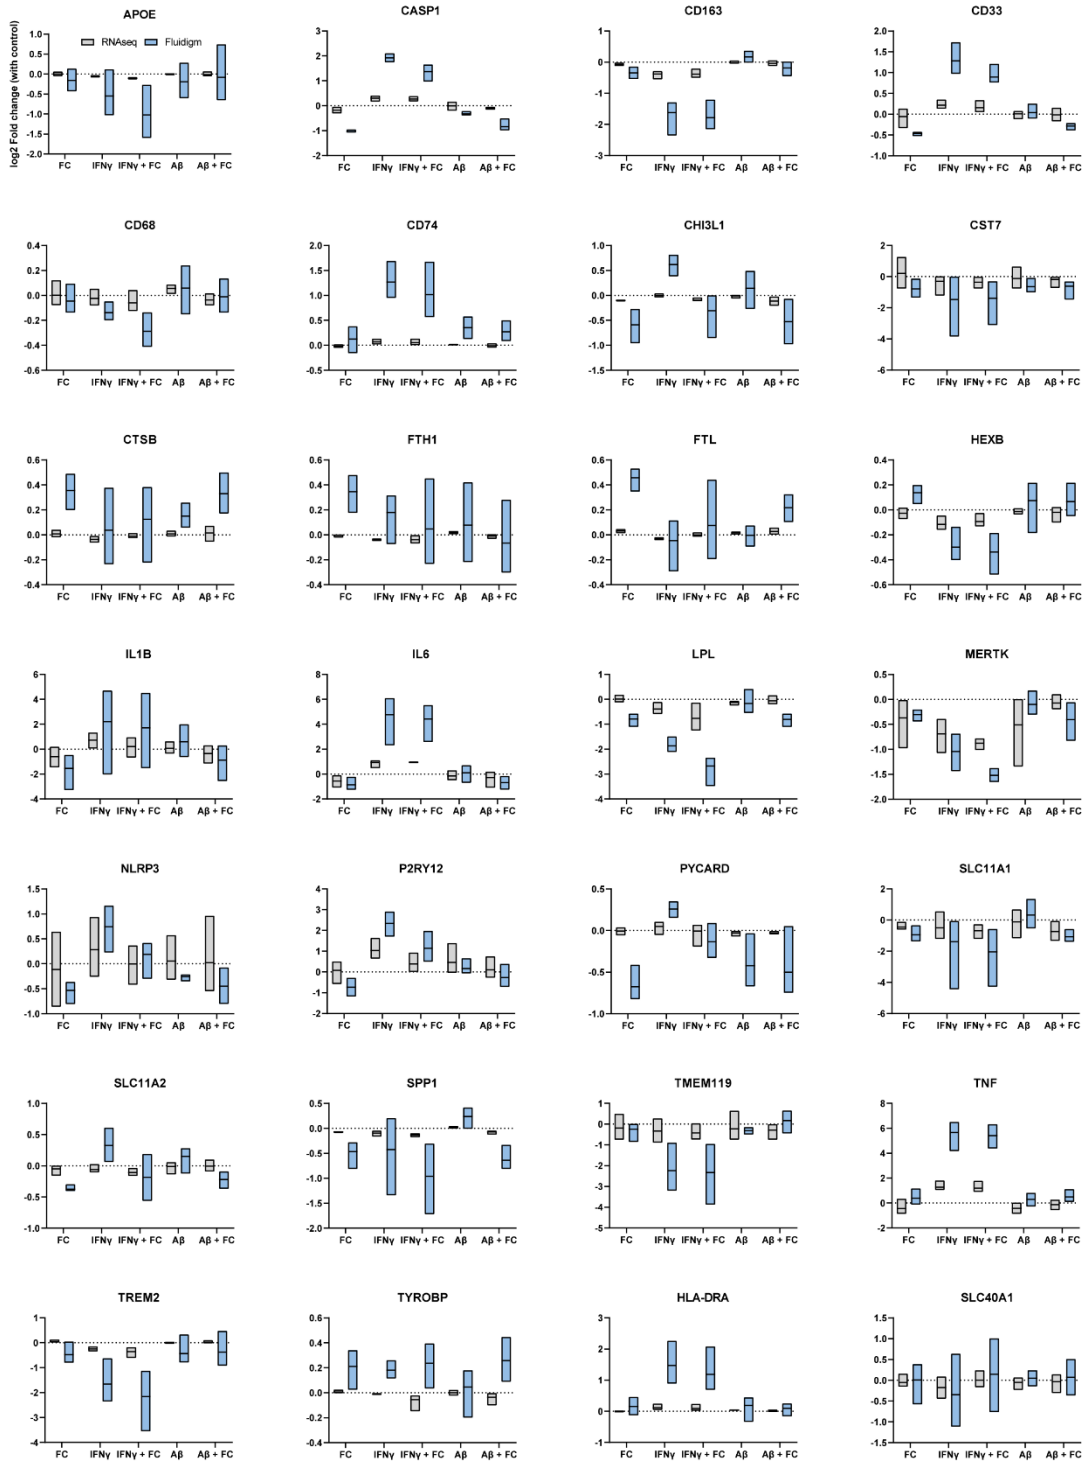

**Fig. S4 Comparison log<sub>2</sub> fold changes RNAseq (grey) vs fluidigm targeted gene expression analysis (blue), related to Figure 4 and 5**

**Table S1. Cell line characteristics, related to Figure 1**

| Alias | Age, y | Sex | Clinical Details | ApoE status | Reprogramming method         | Cell line id | Reference                                                                                                                |
|-------|--------|-----|------------------|-------------|------------------------------|--------------|--------------------------------------------------------------------------------------------------------------------------|
| iPSC1 | 49     | F   | control          | ApoE 3/3    | Non-integrating Sendai virus | 114-1        | Buijsen et al. 2018<br><a href="https://doi.org/10.1016/j.scr.2018.03.018">https://doi.org/10.1016/j.scr.2018.03.018</a> |
| iPSC2 | 15-19  | M   | control          | ApoE 3/4    | Non-integrating Episomal     | BIONi010-C   | Commercial: Ebisc<br><a href="https://cells.ebisc.org/BIONi010-C/">https://cells.ebisc.org/BIONi010-C/</a>               |
| iPSC3 | 44     | F   | control          | ApoE 3/3    | Non-integrating Sendai virus | 127-5        | In house characterization                                                                                                |
| iPSC4 | 45     | M   | control          | ApoE 3/4    | Non-integrating Sendai virus | 138-5        | In house characterization                                                                                                |

**Table S2. Resources, related to experimental procedures**

| <b>Product</b>                                  | <b>Source</b>         | <b>Identifier</b> |
|-------------------------------------------------|-----------------------|-------------------|
| <b>iPSC culturing</b>                           |                       |                   |
| Matrigel                                        | Corning               | #734-1440         |
| mTESR                                           | STEMCELL Technologies | #85870            |
| 37 $\mu$ m Reversible Strainer, large           | STEMCELL Technologies | #27250            |
| Trypan Blue Solution, 0.4%                      | Invitrogen            | #15250-061        |
| AggreWell800                                    | STEMCELL Technologies | #34815            |
| AggreWell Rinsing Solution                      | STEMCELL Technologies | #07010            |
| Accutase                                        | STEMCELL Technologies | #07920            |
| ReLesR                                          | STEMCELL Technologies | #05872            |
| Glutamax                                        | ThermoFisher          | #35050-038        |
| Pen/Strep (100x)                                | Invitrogen            | #15140122         |
| 2-mercaptoethanol                               | ThermoFisher          | #31350-010        |
| N2-supplement                                   | ThermoFisher          | #17502-048        |
| X-VIVO 15                                       | Lonza                 | BE02-060F         |
| Advanced DMEM/F12                               | ThermoFisher          | #12634-010        |
| Poly-D-lysine hydrobromide                      | SIGMA-ALDRICH         | #P0899-50MG       |
| 2% Gelatin solution                             | SIGMA-ALDRICH         | G1393-100mL       |
| <b>Growth factors</b>                           |                       |                   |
| Recombinant Human VEGF                          | Peptotech             | 100-20-B          |
| Human SCF Recombinant Protein                   | ThermoFisher          | PHC2115           |
| Human BMP4 Recombinant Protein                  | ThermoFisher          | PHC9534           |
| Recombinant Human M-CSF                         | Peptotech             | #300-25           |
| Recombinant Human IL-3                          | Peptotech             | #200-03           |
| Recombinant human IL-34                         | Peptotech             | #200-34           |
| Recombinant human GM-CSF                        | Peptotech             | #300-03           |
| <b>Treatment substances</b>                     |                       |                   |
| Human IFN- $\gamma$ - 100ug                     | Peptotech             | 300-02-B          |
| Ferric Ammonium Citrate                         | Sigma-Aldrich         | RES20400-A702X    |
| Ferric Citrate (FC)                             | Sigma-Aldrich         | F3388-250G        |
| Ascorbate                                       | Sigma-Aldrich         | PHR1279-1g        |
| Amyloid $\beta$ -Protein (1-42) (HFIP-treated)  | Bachem                | 4090148.01        |
| Amyloid $\beta$ -Protein (42-1) (HFIP-treated)  | Bachem                | 4107743.01        |
| Cytochalasin D - 1 mg                           | ThermoFisher          | PHZ1063           |
| Lipopolysaccharide (LPS) (From E. Coli O111:B4) | Sigma-Aldrich         | L4391-1MG         |



| <b>Antibodies</b>                                                                           |                      |                         |
|---------------------------------------------------------------------------------------------|----------------------|-------------------------|
| MAP2 (Rabbit)                                                                               | ThermoFisher         | PA17646                 |
| Iba1 (Goat)                                                                                 | Abcam                | ab5076                  |
| TMEM119 (Rabbit)                                                                            | Abcam                | ab185333                |
| P2RY12 (Rabbit)                                                                             | Sigma-Aldrich        | HPA014518               |
| Ferritin (rabbit)                                                                           | Abcam                | ab75973                 |
| Actin (beta) (AC-15)                                                                        | Novus biologicals    | NB600-501               |
| Donkey anti-Goat IgG (H+L) Highly Cross-Adsorbed Secondary Antibody, Alexa Fluor Plus 488   | ThermoFisher         | A32814                  |
| Donkey anti-Rabbit IgG (H+L) Highly Cross-Adsorbed Secondary Antibody, Alexa Fluor Plus 594 | ThermoFisher         | A32754                  |
| goat anti-Rabbit IRDye 800CW                                                                | LI-COR               | 926-32211               |
| goat anti-Mouse IRDye 680CW                                                                 | LI-COR               | 926-68070               |
| <b>IHC/Western Blot/Live cell assays</b>                                                    |                      |                         |
| DAPI (1mg)                                                                                  | Sigma-Aldrich        | D9542                   |
| prolong diamond                                                                             | ThermoFisher         | P36961                  |
| cOmplete™ ULTRA Tablets, Mini, EASYpack Protease Inhibitor Cocktail                         | Roche                | 5892970001              |
| Pierce™ BCA Protein Assay Kit                                                               | ThermoFisher         | 23225                   |
| 4–20% Mini-PROTEAN® TGX™ Precast Protein Gels                                               | BIO-RAD              | 456-1094                |
| Trans-Blot Turbo RTA Mini PVDF Transfer Kit, for 40 blots                                   | BIO-RAD              | 1704272                 |
| FerroOrange                                                                                 | Goryo Chemical       | GC904-01                |
| pHrodo Green Zymosan Bioparticles                                                           | ThermoFisher         | P35365                  |
| Opti-MEM I Reduced Serum Medium - 100 ml                                                    | Gibco                | 31985-062               |
| CELL CULTURE MICROPLATE, 96 WELL, PS, F-BOTTOM (CHIMNEY WELL), µCLEAR                       | Greiner Bio-One      | 655090                  |
| XFe96 FluxPak                                                                               | Seahorse Biosciences | 102416-100              |
| XF Base medium                                                                              | Seahorse Biosciences | 102353-100              |
| D-Glucose 45%                                                                               | Sigma-Aldrich        | G8769                   |
| Rotenone                                                                                    | Sigma-Aldrich        | D8375                   |
| Antimycin A                                                                                 | Sigma-Aldrich        | A8674-25MG              |
| FCCP                                                                                        | Sigma-Aldrich        | C2920-10 MG             |
| Oligomycin A                                                                                | Cayman Chemical      | 11342-5MG               |
| <b>DNA/RNA/PCR kits</b>                                                                     |                      |                         |
| ReliaPrep™ RNA Miniprep Systems                                                             | Promega              | Z6012                   |
| ReliaPrep™ gDNA Tissue Miniprep System                                                      | Promega              | A2052                   |
| Transcriptor First Strand cDNA synthesis Kit                                                | Roche                | Cat. No. 04 897 030 001 |
| NucleoSpin PCR clean-up kit                                                                 | Macherey-Nagel       | 740609.25               |
| KAPA HiFi HotStart ReadyMix                                                                 | Roche                | 7958927001              |
| Qubit dsDNA HS Assay Kit                                                                    | ThermoFisher         | Q32854                  |
| KAPA HyperPlus Kit                                                                          | Roche                | 07962401001             |

| <b>Software</b>                                 |                                              |                                                                                                                                                                 |
|-------------------------------------------------|----------------------------------------------|-----------------------------------------------------------------------------------------------------------------------------------------------------------------|
| Graphpad Prism (Version 8.00)                   | Graphpad                                     | <a href="https://www.graphpad.com/">https://www.graphpad.com/</a>                                                                                               |
| LAS X                                           | Leica                                        | <a href="http://www.leica-microsystems.com">www.leica-microsystems.com</a>                                                                                      |
| Image studio lite (Version 5.2)                 | LI-COR                                       | <a href="https://www.licor.com/bio/image-studio-lite/">https://www.licor.com/bio/image-studio-lite/</a>                                                         |
| Fiji (is ImageJ)                                | NIH                                          | <a href="https://fiji.sc/">https://fiji.sc/</a>                                                                                                                 |
| Adobe Illustrator 2021                          | Adobe                                        | <a href="https://www.adobe.com/products/illustrator">https://www.adobe.com/products/illustrator</a>                                                             |
| R (Version 4.0.3)                               |                                              | <a href="https://www.R-project.org/">https://www.R-project.org/</a>                                                                                             |
| Rstudio (Version 1.4.1717)                      |                                              | <a href="http://www.rstudio.com/">http://www.rstudio.com/</a>                                                                                                   |
| Nf-core/rnaseq (Version 3.2)                    | Ewels et al. 2019 (Ewels et al., 2019)       | <a href="https://nf-co.re/rnaseq/3.2/usage">https://nf-co.re/rnaseq/3.2/usage</a>                                                                               |
| edgeR (Version 3.32.1)                          | Robinson et al. 2010 (Robinson et al., 2010) | <a href="https://bioconductor.org/packages/release/bioc/html/edgeR.html">https://bioconductor.org/packages/release/bioc/html/edgeR.html</a>                     |
| Gplots (Version 3.1.1)                          | Warnes et al. 2020                           | <a href="https://CRAN.R-project.org/package=gplots">https://CRAN.R-project.org/package=gplots</a>                                                               |
| GSEABase (Version 1.52.1)                       | Morgan et al. 2021                           | <a href="https://bioconductor.org/packages/release/bioc/html/GSEABase.html">https://bioconductor.org/packages/release/bioc/html/GSEABase.html</a>               |
| clusterProfiler (Version 3.18.1)                | Yu et al. (2021) (Yu et al., 2012)           | <a href="https://bioconductor.org/packages/release/bioc/html/clusterProfiler.html">https://bioconductor.org/packages/release/bioc/html/clusterProfiler.html</a> |
| gprofiler2 (Version 0.2.0)                      | Kolberg and Raudvere                         | <a href="https://cran.r-project.org/web/packages/gprofiler2/index.html">https://cran.r-project.org/web/packages/gprofiler2/index.html</a>                       |
| matrixStats (Version 0.58.0)                    | Bengtsson et al. 2021                        | <a href="https://CRAN.R-project.org/package=matrixStats">https://CRAN.R-project.org/package=matrixStats</a>                                                     |
| Tidymverse (Version 1.3.1)                      | Wickham et al. 2019 (Wickham et al., 2019)   | <a href="https://tidymverse.org/">https://tidymverse.org/</a>                                                                                                   |
| Biobase (Version 2.50.0)                        | Huber et al. 2015 (Huber et al., 2015)       | <a href="https://bioconductor.org/packages/release/bioc/html/Biobase.html">https://bioconductor.org/packages/release/bioc/html/Biobase.html</a>                 |
| <b>Other</b>                                    |                                              |                                                                                                                                                                 |
| ND-1000 Spectrophotometer                       | NanoDrop                                     |                                                                                                                                                                 |
| TCS SP8 confocal microscope                     | Leica                                        |                                                                                                                                                                 |
| CellInsight CX7 High-Content Screening platform | ThermoFisher                                 |                                                                                                                                                                 |
| BZ-X800 All-in-one fluorescence microscope      | Keyence                                      |                                                                                                                                                                 |
| IncuCyte live cell imaging platform             | Essen Bioscience                             |                                                                                                                                                                 |
| Odyssey Clx                                     | LI-COR                                       |                                                                                                                                                                 |
| Trans-Blot Turbo Transfer system                | BIO-RAD                                      |                                                                                                                                                                 |
| Bioruptor Pico                                  | Diagenode                                    |                                                                                                                                                                 |
| Biomark HD                                      | Fluidigm                                     |                                                                                                                                                                 |
| Access Array                                    | Fluidigm                                     |                                                                                                                                                                 |
| Seahorse XFe96 Analyzer                         | Agilent                                      |                                                                                                                                                                 |
| Qubit 2.0 Fluoremeter                           | ThermoFisher                                 |                                                                                                                                                                 |
| Agilent 2100 Bioanalyzer (Lab-on-a-Chip)        | Agilent                                      |                                                                                                                                                                 |
| NovaSeq 6000                                    | Illumina                                     |                                                                                                                                                                 |

**Table S3. Primersets, related to figure 2, 3 and 4**

| human_Gene_Exon_Fw       | Sequence                | Reverse             | Sequence                |
|--------------------------|-------------------------|---------------------|-------------------------|
| hACTB_F4                 | AGCAAGCAGGAGTATGACGA    | hACTB_R4            | AGAAAGGGTGTAAACGCAACTAA |
| hHMBS F1                 | GCAACGGCGGAAGAAAA       | hHMBS R1            | CGAGGCTTTCAATGTTGCC     |
| hHPRT1 F4                | ACACTGGCAAAAACAATGCA    | hHPRT1 R4           | GGTCCTTTTCACCAGCAAG     |
| hTMEM119_Qex2_Fw         | CTGCTGATGTTTCATCGTCTGT  | hTMEM119_Qex2_Rev   | TCACTCTGGTCCACGTACT     |
| hP2RY12_Qex2_Fw          | GGATACATTCAAACCCTCCAG   | hP2RY12_Qex3_Rev    | GAGGACCTGGGTGATTTTGTAG  |
| hMERTK_Qex15_Fw          | GGGACCTGCATACTTACTTACTT | hMERTK_Qex16_Rev    | TCCATTCCCAGGGCAATATC    |
| hTREM2_Qex1_Fw           | CGGCTGCTCATCTTACTCTTT   | hTREM2_Qex2_Rev     | CAGTGCTTCATGGAGTCATAGG  |
| hFTL_Qex1_Fw2            | CAGCCTGGTCAATTTGTACCT   | hFTL_Qex2_Rev2      | GCCAATTCGCGGAAGAAGTG    |
| hFTH1_Qex2_Fw            | ATGAAGCTGCAGAACCAACG    | hFTH1_Qex3_Rev      | TGCACACTCCATTGCATTGAG   |
| hSLC40A1_Qex7_Fw         | TCTGTCAGTCTGCTGTTTGC    | hSLC40A1_Qex8_Rev   | TCTTGACGCAACTGTGTACAC   |
| hSLC11A2_Qex4_Fw         | ATTTGCAGTCTGGAGCAGTG    | hSLC11A2_Qex5_Rev   | ACTGACGGTGACATACTTCAGC  |
| hIL1B_Qex5_Fw_Edi        | CATGGGATAACGAGGCTTATGT  | hIL1B_Qex5_Rev_Edi  | CATATGGACCAGACATCACCAA  |
| hNLRP3_Qex4_Fw           | TCATGCTGCCTGTTCTCATG    | hNLRP3_Qex5_Rev     | GCTGGTGCCTCAGAAGTAAAAG  |
| hCHI3L1_Qex6_Fw          | ACAGCAGCTATGACATTGCC    | hCHI3L1_Qex7_Rev    | ATCTGTCCAGGACTTGCATCCTC |
| hCD163_Qex6_Fw           | ACTGCAAGAAGTGGCAATGG    | hCD163_Qex7_Rev     | TTCAACACGTCCAGAACAGG    |
| hTNF_Qex2_Fw_Edi         | CCAGGGACCTCTCTCTAATCA   | hTNF_Qex3/4_Rev_Edi | TCAGCTTGAGGGTTTGTCTAC   |
| hIL6_Qex3_Fw_Edi         | CACTCACCTCTTCAGAACGAAT  | hIL6_Qex4_Rev_Edi   | GCTGCTTTCACACATGTTACTC  |
| hRPL13a_Qex2_Fw          | GCCATCGTGGCTAAACAGGTA   | hRPL13a_Qex4_Rev    | GTTGGTGTTCATCCGCTTGC    |
| hHEXB_Qex2_Fw            | GTCAGAGTGTGATGCTTTCCC   | hHEXB_Qex3_Rev      | TAAACCTCGTAATGCTCCCCA   |
| hCD68_Qex4_Fw            | TTGTCTACCTGAGCTACATGGC  | hCD68_Qex5_Rev      | TTGCTGCAACTGAAGCTCTG    |
| hPYCARD_Qex3_Fw          | TGGATGCTCTGTACGGGAAG    | hPYCARD_Qex3_Rev    | CCAGGCTGGTGTGAAACTGAA   |
| hCASP1_Qex2_Fw           | CACAGGCATGCCAAATTTGC    | hCASP1_Qex3/4_Rev   | GAGGAGCTGGAAGGAAGAAAAG  |
| hAPOE_Qex3_Fw2           | GGTCGCTTTTGGGATTACCTG   | hAPOE_Qex4_Rev2     | TCAACTCCTTCATGGTCTCGTC  |
| hCD74_Qex4_Fw            | TGACAGAGGACCATGTGATGC   | hCD74_Qex5/6_Rev    | ATCCAGCTCTCAAAGACCTTCC  |
| hCTSB_Qex7_Fw            | TACAGCCCGACCTACAACAG    | hCTSB_Qex8_Rev      | AGCAGGAAGTCCGAATACACAG  |
| hTYROBP_Qex4_Fw          | ACTGAGACCGAGTCGCCTTAT   | hTYROBP_Qex5_Rev    | ATACGGCCTCTGTGTGTTGAG   |
| hSPP1_Qex5_Fw            | TGCCAGCAACCGAAGTTTTTC   | hSPP1_Qex6_Rev      | TGATGTCTCGTCTGTAGCATC   |
| hSLC11A1_Qex2_Fw         | TCCCCATCCAGACACAAAAC    | hSLC11A1_Qex3_Rev   | AGCAATGCTCATGAGGAAGC    |
| hHLA-DRA_Qex1_Fw         | AGTCCCTGTGCTAGGATTTTCA  | hHLA-DRA_Qex2_Rev   | ACATAAACTCGCCTGATTGGTC  |
| hLPL_Qex2_Fw             | TCATTCGCGAGTAGCAGAGT    | hLPL_Qex3_Rev       | GGCCACAAGTTTTGGACC      |
| hCST7_Qex2_Fw            | TCAACAACTGCACGAACGAC    | hCST7_Qex3_Rev      | GCAGGTGCTGGTTTTTCTTG    |
| hCD33_Qex2_Fw            | AAATCTCCCCAGCTCTCTGTG   | hCD33_Qex3_Rev      | AGCAGGTCAGGTTTTTGGAG    |
| <b>Sanger sequencing</b> |                         |                     |                         |
| hAPOE_ex4_Fw5            | AACAACTGACCCCGGTGGCG    | hAPOE_ex4_Rev5      | ATGGCGCTGAGGCCGCGCTC    |

**Table S4. DEG result (separate file), related to Figure 5.** All identified differentially expressed genes (DEGs) between treatment groups reported alongside their log foldchange (logFC), log counts per million (logCPM), F-statistic (F), *P*-Value and false discovery rate (FDR)

**Table S5. GO analysis results (separate file), related to Figure 5.** All identified significantly affected GO terms in the 4 different identified modules, on which Fig. 5F is based.

**Table S6. GSEA analysis results (separate file), related to Figure 5.** All overrepresented classes of genes identified using gene set enrichment analysis (GSEA), on which Fig. S3 is based.

## Experimental procedures

### *Differentiation of iPSC-MG*

iPSC-MG were differentiated following a protocol by Haenseler *et al.* (Haenseler *et al.*, 2017), with minor adaptations for upscaling of the production of iPSC-MG as described by Banerjee *et al.* (Banerjee *et al.*, 2020). iPSCs were cultured in mTESR (STEMCELL Technologies) until 80% confluent, after which they were lifted using Accutase (STEMCELL Technologies), counted and plated in an Aggrewell800 (STEMCELL Technologies) at a density of approximately 13.000 cells per miniwell to form embryoid bodies (EBs). Cells were cultured in mTESR supplemented with 50ng/mL VEGF (Peprotech), 50 ng/mL BMP4 (ThermoFisher), and 20 ng/mL SCF (ThermoFisher) for 5 days, after which EBs were lifted, collected over a strainer and plated in a 6-well plate at 12 EBs/well in 4mL X-VIVO 15 (Lonza) with 50ng/mL m-CSF (Peprotech) and 25 ng/mL IL-3 (Peprotech). Media was changed weekly and the development of myeloid precursors was tracked by phase contrast microscopy twice a week. After approximately 4 weeks, myeloid precursors were collected from the supernatant weekly, and plated on 0.01 µg/mL Poly-D-lysine (Sigma-Aldrich) and 0.01% gelatin (Sigma-Aldrich) coated plates at a density of 50.000/cm<sup>2</sup>. Cells were cultured in microglia media, consisting of advanced DMEM/F12 (ThermoFisher) supplemented with Glutamax (ThermoFisher), N2-supplement (ThermoFisher), 2-mercaptoethanol (ThermoFisher), 100 ng/mL IL-34 (Peprotech), and 10 ng/mL GM-CSF (Peprotech). Half of the media was changed every other day and iPSC-MG were considered mature after 14 days.

### *Organoid generation and hiPSC-MG integration*

Forebrain organoids were generated from control iPSC (iPSC4) using the STEMdiff Cerebral Organoid kit (StemCell Technologies; based on Lancaster *et al.* (Lancaster and Knoblich, 2014)), according to the manufacturer's instructions. Briefly, iPSCs were collected as a single cell suspension using Accutase before being resuspended at 9000 cells (in 100 µL EB formation media) per well in a V-bottom 96 well plate, to form embryoid bodies (EBs; day 0). Media was topped up with additional 100 µL at day 2 and 4. On day 5, single EBs were transferred to a 48 well plate in induction media. On day 7, EBs were embedded in a drop (25-50 µL) of Matrigel and incubated in expansion media (12 EBs per well of a 6 well plate). At day 10, media was swapped for maturation media and organoids were cultured on an orbital shaker at 65rpm at 37, with media changed twice weekly for long-term culture. At day 43, organoids were transferred to a 24 well plate and 2x10<sup>5</sup> hiPSC-MGs were collected and added to the well. Integration of hiPSC-MG into the organoids was tracked using brightfield imaging, over the next week.

### *Sanger sequencing*

iPSCs were lifted using Accutase (STEMCELL technologies), spun down and a pellet was frozen for DNA isolation. DNA was isolated using the gDNA tissue miniprep system (Reliaprep) and purity of DNA was assessed using a ND-1000 Spectrophotometer (Nanodrop). PCR was performed using primers covering single-nucleotide polymorphisms rs429458 and rs7412, which determine the *APOE* genotype. Subsequently, the primer product was cleaned using the NucleoSpin PCR clean-up kit (Macherey-Nagel) before Sanger sequencing.

### *Immunofluorescence*

For IF stainings, hiPSC-MGs were washed with PBS 24 hours post-intervention and fixed with 4% PFA for 10 min. Subsequently, cells were washed with PBS before permeabilization for 5 min with 0.1% Triton X-100 in PBS and subsequent washing with PBS. Organoids with integrated hiPSC-MG were washed with PBS, fixed in 4% PFA overnight at 4°C, washed with PBS and cryoprotected for 2-3 days in 30% sucrose at 4°C. Organoids were frozen in ethanol cooled with dry ice and stored at -80°C. Frozen organoids were cut on a cryostat (Leica CM3050) at 16 µm. Non-specific antigens were blocked for 1 hour with blocking solution (3% BSA in PBS). Cells were incubated overnight at 4°C with the following primary antibodies diluted in blocking solution: goat anti-Iba1 (1:500, Abcam, ab5076) with rabbit anti-TMEM119 (1:100, Abcam, ab185333), rabbit anti-P2RY12 (1:200, Sigma-Aldrich, HPA014518) or rabbit anti-MAP2 (1:1000, ThermoFisher, PA17646). Cells were washed in PBS and incubated with the secondary

antibodies donkey-anti-goat Alexa 488 (1:500, ThermoFisher, #A32814) and donkey-anti-rabbit (1:500, ThermoFisher, #A32754) in blocking solution for 3 hours at room temperature. Cells were washed with PBS and incubated for 5 min with 0.1 µg/mL DAPI (Sigma Aldrich) in PBS to label nuclei. Finally, cells on coverslips were mounted with ProLong diamond Antifade Mountant (ThermoFisher), while cells in 96-well plates were covered with PBS and imaged within 1 week. All PBS wash steps were performed three times for five minutes.

#### *Imaging*

Coverslips were imaged either using a BZ-X800 All-in-one fluorescence microscope (Keyence) with 10x objective for low magnification whole overview images (1460 x 1095 µm, at 960x720 pixels), or a TCS SP8 confocal microscope (Leica) with 40x objective for high-magnification images (385 x 385 µm, at 2048 x 2048 pixels). All imaging conditions were identical for all experimental conditions for different stains (e.g. exposure time and laser power). HiPSC-MGs cultured and stained in 96-well flat bottom plates were imaged using the CellInsight CX7 High-Content Screening platform (ThermoFisher). Nuclei were identified using DAPI, and all identified DAPI+ nuclei were assessed for positivity of the cells for Iba1 (threshold determined based on negative control in which primary anti-Iba1 antibody was omitted).

#### *Labile iron imaging*

HiPSC-MG were cultured in 96-well flat bottom plates and following 24 h treatment with FC/IFN $\gamma$ /AB hiPSC-MG were washed twice with PBS and incubated with 200µM FerroOrange (Goryo chemical) in HBSS for 30 min. Subsequently, hiPSC-MG were washed with PBS and Opti-MEM (Gibco) was added for live cell imaging BZ-X800 All-in-one fluorescence microscope (Keyence). Images were obtained with a 10x objective (1460 x 1095 µm, at 960x720 pixels). Labile iron quantity was quantified using Fiji (NIH), by firstly applying automated thresholding for intracellular iron using a iterative self-organizing data analysis (Isodata) algorithm (Ridler and Calvard, 1978), and subsequently measuring mean fluorescent intensity.

#### *Western Blot*

HiPSC-MGs cultured in a 12-well plate were washed with and frozen at -20 °C. After 24 hours, radioimmunoprecipitation assay buffer, supplemented with a protease inhibitor cocktail (Roche), was used lyse the cells. Subsequently, cells were sonicated using a Bioruptor Pico water bath sonicator (Diagenode) for 10 min. Protein concentrations were determined using Pierce BCA Protein Assay Kit (Thermo Fisher). 10 µg total protein was separated on a 4-20 % Mini-PROTEAN TGX Precast Protein Gel (BIO-RAD) under reducing conditions, and transferred to polyvinylidene difluoride (PVDF) membranes using a Trans-Blot Turbo Transfer system (BIO-RAD). PVDF membranes were blocked for 1 h with 5% milk in Tris buffered saline with 0.1% Tween 20 (hereafter TBST), and probed with rabbit anti-ferritin (1:1000, Abcam, ab75973) and mouse anti- $\beta$ -actin (1:5000, Novus biologicals, NB600-501) overnight at 4 °C. Membranes were washed three times with TBST and incubated with goat anti-Rabbit IRDye 800CW (1:10000, LI-COR, 926-32211) and goat anti-Mouse IRDye 680CW (1:1000, LI-COR, 926-68070) and imaged using an Odyssey CLx infrared imaging system (LI-COR). Bands were quantified using Image Studio (Version 5.2, LI-COR), and normalized to  $\beta$ -actin signal.

#### *Gene-expression analysis*

RNA from hiPSC-MGs was collected using ReliaPrep RNA Miniprep system (Promega). Briefly, hiPSC-MGs cultured in a 12-well plate were washed with PBS and lysis buffer was added directly to the plate. Cells were pipetted repeatedly to shear the DNA and buffer was collected in an Eppendorf tube after which the protocol was followed as instructed by the manufacturer. Concentration and purity of RNA was assessed using a ND-1000 Spectrophotometer (Nanodrop). Targeted gene expression analysis

200ng of RNA was converted into cDNA using the Transcriptor First Strand cDNA synthesis Kit (Roche). Gene expression was assessed using a 96x96 Dynamic Array (Fluidigm), which allows for testing of 96 samples and 32 primer sets in a single assay. A total list of primer sets used can be found in table S3. The Dynamic array was performed following manufacturer's guidelines. In brief, cDNA was pre-amplified for 11 cycles using a mixture of all primer sets, following protocol PN 100-5875 (Fluidigm). Subsequently, following protocol PN100-9792 (Fluidigm), a 96x96



accounting for the different experimental conditions of the samples (Robinson and Oshlack, 2010). As only the final 200 basepairs of the 3' end were prepared in library prep, gene counts were not normalized for transcript length. Principal component analysis was performed on filtered normalized data with the `prcomp` function. Following, differential gene expression analysis was performed using the `glmQLFTest` function from `edgeR`. Differential expression was assessed for each gene using an exact test analogous to Fisher's exact test, but adapted for overdispersed data. We adjusted for any baseline differences between the different iPSC lines by fitting an additive model, to make comparison between treatments more precise, as was described in section 3.4.2 of the `edgeR` vignette (Chen et al.). Heatmaps were produced using the `heatmap.2` function of `gplots` (Version 3.1.1) based on hierarchically clustered data of the top 60 differentially expressed genes (DEGs) for IFN $\gamma$  treated samples and all DEGs for all other groups. Modules were extracted and functional enrichment analysis was performed using both Gene Ontology (GO) enrichment analysis and Gene Set Enrichment Analysis (GSEA) using the `gost` function of `gprofiler2` (Version 0.2.0) and the `GSEA` function of the `clusterProfiler` (Version 3.18.1) package respectively. Results from RNAseq analysis were validated via comparison with results from targeted gene expression analysis using the Dynamic Array (Fluidigm). Although the log<sub>2</sub> fold changes differ, the direction of log<sub>2</sub> fold changes between different treatment groups is the same in both targeted gene expression analysis with a Dynamic Array and unbiased RNAseq analysis (Fig. S4).

#### *Phagocytosis assay*

Phagocytosis assay was performed using pHrodo Zymosan A particles (ThermoFisher) and imaged using an IncuCyte S3 Live-Cell Analysis System (Essen Bioscience). HiPSC-MGs were treated with previously defined conditions for 24 h, and additionally separate wells were treated with 100 ng/mL LPS (Sigma-Aldrich) for 24h or 10 Cytochalasin D (ThermoFisher) for 30 min. Media was replaced with Opti-MEM (Gibco) containing 25  $\mu$ g/mL pHrodo particles and subsequently live-cell imaged every 30 min with a FITC filter (Exposure: 400 ms) and phase imaging for 24 h. Total fluorescence was quantified using Incucyte S3 software (Essen Bioscience), and normalized to cell confluence, which was quantified on the phase images using Incucyte software. Data was exported and area under the curve (AUC) and half time for max phagocytosis were calculated using Graphpad Prism (Version 8.00, La Jolla, San Diego, CA, USA).

#### *Seahorse bioenergetics assay*

Bio-energetic properties of the hiPSC-MGs were assessed using Seahorse XFe96 Analyzer (Agilent) for real-time cell metabolic analysis. HiPSC-MGs were cultured in 96-well Seahorse XF cell culture plate (Agilent) for 14 days as normal, before treatments as described. After treatment, both glycolysis and mitochondrial functional were assessed simultaneously, following a previously described protocol (Van den Bossche et al., 2015). In brief, treatment media was replaced with XF assay medium supplemented with 200 mM Glutamax (ThermoFisher) and cells were incubated in a 0% CO<sub>2</sub> incubator for approximately 1h. Electron transport chain modulators were sequentially injected in a Seahorse XF96 analyzer: 25 mM glucose (to induce glycolysis); 1  $\mu$ M oligomycin (to inhibit ATP synthase); 1  $\mu$ M carbonyl cyanide-4-phenylhydrazone (FCCP; to uncouple mitochondrial respiration and assess maximal and spare respiratory capacity); 1  $\mu$ M rotenone combined with 1  $\mu$ M antimycin A (RA; to block mitochondrial complex I and III, and assess non-mitochondrial oxygen consumption; all Sigma-Aldrich). Both extracellular acidification rate (ECAR; mpH/min) and oxygen consumption rate (OCR; pMoles O<sub>2</sub>/min) were assessed in real time, which were used to calculate glycolytic and mitochondrial respiration parameters, according to manufacturer's instructions. After the assay, cells were stained using 0.1  $\mu$ g/mL DAPI (Sigma-Aldrich), and number of nuclei were counted using the CellInsight CX7 High-Content Screening platform (ThermoFisher), and used to normalized the results.



### *Replicates*

Optimal reproducibility was attempted by studying all conditions simultaneously three times for each individual iPSC lines. Most assays have an  $n = 12$ , meaning 3 independent experiments were performed with 4 iPSC-lines. An experiment was considered independent when it was performed with a batch of iPSC-MG that was differentiated separately from precursor myeloid cells to microglia. A technical replicate was considered as another well from the same differentiation from myeloid cells to microglia. Technical replicates were used for the, labile iron imaging, phagocytosis assay and seahorse metabolism assay, and were averaged to obtain 1 datapoint.

## References

- Bagnoli, J.W., Ziegenhain, C., Janjic, A., Wange, L.E., Vieth, B., Parekh, S., Geuder, J., Hellmann, I., and Enard, W. (2018). Sensitive and powerful single-cell RNA sequencing using mcSCR-seq. *Nat. Commun.* 2018 91 9, 1–8.
- Banerjee, P., Paza, E., Perkins, E.M., James, O.G., Kenkhuis, B., Lloyd, A.F., Burr, K., Story, D., Yusuf, D., He, X., et al. (2020). Generation of pure monocultures of human microglia-like cells from induced pluripotent stem cells. *Stem Cell Res.* 49.
- Van den Bossche, J., Baardman, J., and de Winther, M.P.J. (2015). Metabolic characterization of polarized M1 and M2 bone marrow-derived macrophages using real-time extracellular flux analysis. *J. Vis. Exp.* 2015, 53424.
- Chen, Y., McCarthy, D., Ritchie, M., Robinson, M., Smyth, G., and Hall, E. edgeR: differential analysis of sequence read count data User's Guide.
- Ewels, P., Hammarén, R., Peltzer, A., Moreno, D., Garcia, M., rfenouil, marchoeppner, Panneerselvam, S., F., S., jun-wan, et al. (2019). nf-core/rnaseq: nf-core/rnaseq version 1.4.2.
- Haenseler, W., Sansom, S.N., Buchrieser, J., Newey, S.E., Moore, C.S., Nicholls, F.J., Chintawar, S., Schnell, C., Antel, J.P., Allen, N.D., et al. (2017). A Highly Efficient Human Pluripotent Stem Cell Microglia Model Displays a Neuronal-Co-culture-Specific Expression Profile and Inflammatory Response. *Stem Cell Reports* 8, 1727–1742.
- Huber, W., Carey, V.J., Gentleman, R., Anders, S., Carlson, M., Carvalho, B.S., Bravo, H.C., Davis, S., Gatto, L., Girke, T., et al. (2015). Orchestrating high-throughput genomic analysis with Bioconductor. *Nat. Methods* 2015 122 12, 115–121.
- Lancaster, M.A., and Knoblich, J.A. (2014). Generation of cerebral organoids from human pluripotent stem cells. *Nat. Protoc.* 2014 910 9, 2329–2340.
- Ridler, T.W., and Calvard, S. (1978). PICTURE THRESHOLDING USING AN ITERATIVE SLECTION METHOD. *IEEE Trans. Syst. Man Cybern.* SMC-8, 630–632.
- Robinson, M.D., and Oshlack, A. (2010). A scaling normalization method for differential expression analysis of RNA-seq data. *Genome Biol.* 2010 113 11, 1–9.
- Robinson, M.D., McCarthy, D.J., and Smyth, G.K. (2010). edgeR: a Bioconductor package for differential expression analysis of digital gene expression data. *Bioinformatics* 26, 139–140.
- Wickham, H., Averick, M., Bryan, J., Chang, W., McGowan, L.D., François, R., Grolemund, G., Hayes, A., Henry, L., Hester, J., et al. (2019). Welcome to the Tidyverse. *J. Open Source Softw.* 4, 1686.
- Yu, G., Wang, L.-G., Han, Y., and He, Q.-Y. (2012). clusterProfiler: an R Package for Comparing Biological Themes Among Gene Clusters. <https://Home.Liebertpub.Com/Omi> 16, 284–287.
